# Supplementary material
Source: MDPI journal article supplement (https://www.mdpi.com/2563-6499/5/2/22)
Supplement: s1 [file s1]

Archive with 1 entries (1 files):
- siuj-2844986-supplementary.pdf
